# Supplementary material
Source: ML conference proceedings conference paper supplement (https://openreview.net/forum?id=3ZeGLibhFo0)
Supplement: supplementary_material [file attachment]

# SUPPLEMENTARY MATERIAL FOR ENABLING COUNTERFACTUAL SURVIVAL ANALYSIS WITH BALANCED REPRESENTATIONS

**Anonymous authors**

Paper under double-blind review

## 1 GENERAL LOG-LIKELIHOOD

The general likelihood-based loss hypothesis that accounts for informative censoring is formulated as:

$$-\ell_{h,\Phi,\nu}(t_a, c_a, y, \delta) = \log p_{h,\Phi,\nu}(T_A, C_A|X = x) \quad (1)$$

$$= \log p_{h,\Phi}(T_A|X = x) + \log p_{\nu,\Phi}(C_A|X = x), \quad (2)$$

where (2) follows from the conditional independence (informative censoring) assumption  $T \perp\!\!\!\perp C|X, A$ . For some parametric formulations of event  $p_{h,\Phi}(T_A|X = x)$  and censoring  $p_{\nu,\Phi}(C_A|X = x)$  time distributions, *e.g.*, exponential, Weibull, log-Normal, *etc.*, then  $-\ell_{h,\Phi,\nu}(t_a, c_a, y, \delta)$  is the closed-form log-likelihood, where:

$$\log p_{h,\Phi}(T_A|X = x) \triangleq \delta \cdot \log f_{h,\Phi}(t_a|x) + (1 - \delta) \cdot \log S_{h,\Phi}(t_a|x), \quad (3)$$

$$\log p_{\nu,\Phi}(C_A|X = x) \triangleq (1 - \delta) \cdot \log e_{\nu,\Phi}(c_a|x) + \delta \cdot \log G_{\nu,\Phi}(c_a|x), \quad (4)$$

where  $\{S_{h,\Phi}(\cdot), G_{\nu,\Phi}(\cdot)\}$  and  $\{f_{h,\Phi}(\cdot), e_{\nu,\Phi}(\cdot)\}$  are survival and density functions respectively.

## 2 METRICS

### 2.1 ESTIMANDS OF INTEREST

Several common estimands of interest include (Zhao et al., 2012; Trinquart et al., 2016):

- Difference in expected lifetime:  $\text{ITE}(t, x) = \int_0^{t_{\max}} \{S_1(t|x) - S_0(t|x)\} dt = \mathbb{E}\{T_1 - T_0|X = x\}$ .
- Difference in survival function:  $\text{ITE}(t, x) = S_1(t|x) - S_0(t|x)$ .
- Hazard ratio:  $\text{ITE}(t, x) = \lambda_1(t|x)/\lambda_0(t|x)$ .

In our experiments, we consider both the hazard ratio and difference in expected lifetime. The difference of expected lifetime is expressed in terms of both survival functions and expectations:

$$\begin{aligned} \mathbb{E}[T|X = x] &= \int_{-\infty}^{\infty} t f(t|x) dt \\ &= \int_0^{\infty} (1 - F(t|x)) dt - \int_{-\infty}^0 F(t|x) dt \end{aligned} \quad (5)$$

$$= \int_0^{t_{\max}} S(t|x) dt, \quad (6)$$

where (5) follows from standard properties of expectations and (6) from  $1 - F(t|x) = S(t|x)$  and  $\int_{-\infty}^0 F(t|x) dt = 0$ . Below we formulate an approach for estimating the individualized and population hazard ratio.

### 2.2 NONPARAMETRIC HAZARD RATIO

From standard survival function definitions (Kleinbaum & Klein, 2010), the relationship between survival and hazard function is formulated as

$$\lambda(t|x) = \lim_{dt \rightarrow 0} \frac{P(t < T < t + dt|X = x)}{P(T > t|X = x)dt} = -\frac{d \log S(t|x)}{dt} = \frac{f(t|x)}{S(t|x)}. \quad (7)$$

We propose a new *nonparametric hazard ratio*, model-free estimator for computing  $\text{HR}(t)$ .

**Definition 1** We define the *nonparametric marginal Hazard Ratio* and its approximation,  $\hat{\text{HR}}(t)$ , as

$$\text{HR}(t) = \frac{\lambda_1(t)}{\lambda_0(t)} = \frac{S_0(t)}{S_1(t)} \cdot \frac{S'_1(t)}{S'_0(t)}, \quad \hat{\text{HR}}(t) = \frac{\hat{S}_0^{\text{PKM}}(t)}{\hat{S}_1^{\text{PKM}}(t)} \cdot \frac{m_1(t)}{m_0(t)}, \quad (8)$$

where for  $\text{HR}(t)$  we leveraged (7) and  $S'(t) \triangleq dS(t)/dt$ . For the estimator  $\hat{\text{HR}}(t)$ , provided that  $S(t)$  is a monotonically decreasing function, for simplicity, we fit a linear function  $S(t) = m \cdot t + c$  and set  $S'(t) \approx m$ . Further, we leverage  $\hat{S}^{\text{PKM}}(t)$  in (Chapfuwa et al., 2020), defined as the model-free population point-estimate-based nonparametric Kaplan-Meier (Kaplan & Meier, 1958) estimator. We denote  $J$  distinct and ordered observed event times (censored and non-censored) by the set  $\mathcal{T} = \{t_j | t_j > t_{j-1} > \dots > t_0\}$  from  $N$  realizations of  $Y$ . Formally, the *population survival*  $\hat{S}_A^{\text{PKM}}(t)$  is recursively formulated as

$$\hat{S}_A^{\text{PKM}}(t_j) = \left( 1 - \frac{\sum_{n:\delta_n=1} \mathbb{I}(t_{j-1} \leq \gamma(T_A^{(n)}) < t_j)}{N - \sum_{n=1}^N \mathbb{I}(\gamma(T_A^{(n)}) < t_{j-1})} \right) \hat{S}_A^{\text{PKM}}(t_{j-1}), \quad (9)$$

where  $\hat{S}_A^{\text{PKM}}(t_0) = 1$ , and  $\mathbb{I}(b)$  represent an indicator function such that  $\mathbb{I}(b) = 1$  if  $b$  holds or  $\mathbb{I}(b) = 0$  otherwise. Further,  $\gamma(\cdot)$  is a deterministic transformation for summarizing  $T_A$ , in our experiments,  $\gamma(\cdot) = \text{median}(\cdot)$ , computed over samples from  $t_a \sim p_{h,\Phi}(T_A|X=x)$ . Note from (9), we marginalize both *factual* and *counterfactual* predictions given covariates  $x$ .

A similar formulation for the conditional, *individualized*  $\text{HR}(t|x)$ , can also be derived, where the cumulative density  $F_A(t|x) = 1 - S_A(t|x)$ , is estimated with a Gaussian Kernel Density Estimator (KDE) (Silverman, 1986) on samples from the model,  $t_a \sim p_{h,\Phi}(T_A|X=x)$ . Then we have:

$$\text{HR}(t|x) = \frac{\lambda_1(t|x)}{\lambda_0(t|x)} = \frac{S_0(t|x)}{S_1(t|x)} \cdot \frac{S'_1(t|x)}{S'_0(t|x)}, \quad \hat{\text{HR}}(t|x) = \frac{\hat{S}_0^{\text{KDE}}(t|x)}{\hat{S}_1^{\text{KDE}}(t|x)} \cdot \frac{m_1(t|x)}{m_0(t|x)}, \quad (10)$$

where,  $S'(t|x) \triangleq dS(t|x)/dt$  is also approximated with fitting a linear function  $S(t|x) = m \cdot t + c$ , and setting  $S'(t|x) \approx m$ . Note that for some parametric formulations,  $\text{HR}(t|x)$ , can be readily evaluated because  $f(t_a|x)$  and  $S(t_a|x)$  are available in closed form.

### 2.3 FACTUAL METRICS

**Concordance Index** C-Index (also related to receiver operating characteristic) is a widely used survival ranking metric which naturally handles censoring. It quantifies the consistency between the order of the predicted times or risk scores relative to ground truth. C-Index is evaluated on point estimates, we summarize individualized predicted samples from CSA and CSA-INFO, *i.e.*,  $t_a = \text{median}(\{t_s\}_{s=1}^{200})$ , where  $t_s$  is a sample from the trained model.

**Calibration Slope** Calibration quantifies distributional statistical consistency between model predictions relative to ground truth. We measure *population* calibration by comparing population survival curves from model predictions against ground truth according to Chapfuwa et al. (2020). We desire a high calibrated model, with calibration slope of 1, while a slope  $< 1$  and slope  $> 1$  indicates underestimation or overestimation risk, respectively.

**Coefficient of Variation** The coefficient of variation (COV)  $\sigma\mu^{-1}$ , the ratio between standard deviation and mean, quantifies distribution dispersion. A COV  $> 1$  and  $< 1$  indicates a high or low variance distribution, in practice, we desire low variance distribution. We use Mean COV  $N^{-1} \sum_{i=1}^N \sigma_i \mu_i^{-1}$ , where for subject  $i$  we compute  $\{\mu_i, \sigma_i\}$  from samples  $\{t_s\}_{s=1}^{200}$ .

## 3 BASELINES

**Cox proportional hazard (CoxPH)** CoxPH assumes a semi-parametric linear model  $\lambda(t|a) = \lambda_b(t) \exp(a\beta)$ , thus the hazard ratio between treatment and control can be obtained without specifying

ing the baseline hazard  $\lambda_b(t)$ :

$$\text{HR}(t) = \frac{\lambda(t|a=1)}{\lambda(t|a=0)} = \exp(\beta). \quad (11)$$

A simple logistic model  $\hat{e}_i = \sigma(x_i; \eta)$ , is used to approximate the unknown propensity score  $P(A=1|X=x)$ . Methods that adjust for selection bias (or confounding) learn  $\beta$  by maximizing a propensity weighted partial likelihood (Schemper et al., 2009; Buchanan et al., 2014; Rosenbaum & Rubin, 1983)

$$\mathcal{L}(\beta) = \prod_{i:\delta_i=1} \left( \frac{\exp(a_i\beta)}{\sum_{j:t_j \geq t_i} \hat{w}_j \cdot \exp(a_j\beta)} \right)^{\hat{w}_i}. \quad (12)$$

We consider three normalized weighting schemes for  $w$ , namely, (i) inverse probability weighting (IPW) (Horvitz & Thompson, 1952; Cao et al., 2009), where  $\text{IPW}_i = \frac{a_i}{\hat{e}_i} + \frac{1-a_i}{1-\hat{e}_i}$ , (ii) overlapping weights (OW) (Crump et al., 2006; Li et al., 2018), where  $\text{OW}_i = a_i \cdot (1 - \hat{e}_i) + (1 - a_i) \cdot \hat{e}_i$ , and (iii) the standard RCT Uniform assumption. Note that this modeling approach requires fitting over the entire dataset, thus has no inference capability.

**Accelerated Failure Time (AFT)** We implement IPM regularized neural-based log-Normal and Weibull AFT baselines. Both approaches have a desirable closed form  $S_{h,\Phi}(t_a|x)$ , thus enabling maximum likelihood based estimation, where

$$-\mathcal{L}_F^{\text{AFT}} \triangleq \mathbb{E}_{(y,\delta,x,a) \sim p(y,\delta,X,A)} [\delta \cdot \log f_{h,\Phi}(t_a|x) + (1 - \delta) \cdot \log S_{h,\Phi}(t_a|x)]. \quad (13)$$

The log-Normal mean and variance parameters are learned such that,  $\log t_a = \mu_{h,\Phi}(h(r,a)) + \epsilon$ , where  $\epsilon \sim \mathcal{N}(0, \sigma_{h,\Phi}^2(h(r,a)))$  and  $r = \Phi(x)$ . Further, we learn the Weibull scale and shape parameters, where  $t_a = \lambda_{h,\Phi}(h(r,a)) \cdot (-\log U)^{(k_{h,\Phi}(h(r,a)))^{-1}}$  and  $U \sim \text{Uniform}(0,1)$ . We regularize (13) with the IPM loss, for maximum likelihood optimization.

**Semi-supervised regression (SR)** To demonstrate the effectiveness of our flow-based uncertainty estimation approach we contrast CSA with a deterministic accuracy objective from Chapfuwa et al. (2018), where  $t_a = h(r,a)$  and:

$$\mathcal{L}_F^{\text{SR}} \triangleq \mathbb{E}_{(y,\delta,x,a) \sim p(y,\delta,X,A)} [\delta \cdot (|y - t_a|) + (1 - \delta) \cdot (\max(0, y - t_a))], \quad (14)$$

where (14) is regularized according to the IPM loss.

**Survival Bayesian additive regression trees (Surv-BART)** Surv-BART (Sparapani et al., 2016) is a nonparametric tree-based approach for estimating individualized survivals  $\hat{S}(t_a^{(j)}|X=x)$  (defined at pre-specified  $J$  time-horizons) from an ensemble of regression trees. Note, Surv-BART does not adjust for both selection bias and informative censoring. While, we fit two separate models based on factual treatment and control data, causal metrics are estimated with both *factual* and *counterfactual* predictions.

## 4 EXPERIMENTS

### 4.1 GENERATING ATCG-SYNTHETIC DATASET

The ACTG-SYNTHETIC, is a semi-synthetic dataset based on ACTG covariates (Hammer et al., 1996). We simulate potential outcomes according to a Gompertz-Cox distribution (Bender et al., 2005) with selection bias from a simple logistic model for  $P(A=1|X=x)$  and AFT-based censoring

Table 1: Performance comparisons on ACTG data, with 95%  $HR(t)$  confidence interval. Test set NN assignment of  $y_{CF}$  and  $\delta_{CF}$  yields unbiased ground truth estimator  $HR(t) = 0.54_{(0.51, 0.61)}$ , since study is a RCT.

| Method              | Causal                              | Factual            |          |                    |
|---------------------|-------------------------------------|--------------------|----------|--------------------|
|                     | $HR(t)$                             | C-Index (A=0, A=1) | Mean COV | C-Slope (A=0, A=1) |
| CoxPH-Uniform       | 0.49 <sub>(0.38, 0.64)</sub>        | NA                 | NA       | NA                 |
| CoxPH-IPW           | 0.49 <sub>(0.36, 0.68)</sub>        | NA                 | NA       | NA                 |
| CoxPH-OW            | 0.49 <sub>(0.36, 0.68)</sub>        | NA                 | NA       | NA                 |
| Surv-BART           | 3.93 <sub>(3.93, 4.90)</sub>        | (0.665, 0.845)     | 0.001    | (0.394, 0.517)     |
| AFT-Weibull         | <b>0.53</b> <sub>(0.53, 0.53)</sub> | (0.53, 0.351)      | 3.088    | (0.847, 0.813)     |
| AFT-log-Normal      | 3.75 <sub>(3.75, 3.75)</sub>        | (0.717, 0.619)     | 7.995    | (0.847, 0.321)     |
| SR                  | 0.21 <sub>(0.21, 0.28)</sub>        | (0.628, 0.499)     | 0        | (1.388, 0.442)     |
| CSA (proposed)      | 0.63 <sub>(0.59, 0.68)</sub>        | (0.831, 0.814)     | 0.132    | (1.042, 1.129)     |
| CSA-INFO (proposed) | 0.6 <sub>(0.54, 0.66)</sub>         | (0.786, 0.822)     | 0.13     | (0.875, 0.938)     |

mechanism. Below is our generative scheme:

$$\begin{aligned}
 X &= \text{ACTG covariates} \\
 P(A = 1|X = x) &= \frac{1}{b} \times (a + \sigma(\eta(\text{AGE} - \mu_{\text{AGE}} + \text{CD40} - \mu_{\text{CD40}}))) \\
 T_A &= \frac{1}{\alpha_A} \log \left[ 1 - \frac{\alpha_A \log U}{\lambda_A \exp(x^T \beta_A)} \right], \quad U \sim \text{Uniform}(0, 1) \\
 \log C &\sim \text{Normal}(\mu_c, \sigma_c^2) \\
 Y &= \min(T_A, C), \quad \delta = 1 \text{ if } T_A < C, \text{ else } \delta = 0,
 \end{aligned}$$

where  $\{\beta_A, \alpha_A, \lambda_A, b, a, \eta, \mu_c, \sigma_c\}$  are hyper-parameters and  $\{\mu_{\text{AGE}}, \mu_{\text{CD40}}\}$  are the means for age and CD40 respectively. This semi-synthetic dataset will be made publicly available.

## 4.2 QUANTITATIVE RESULTS

See Table 1 for additional quantitative comparisons on ACTG dataset.

## 4.3 QUALITATIVE RESULTS

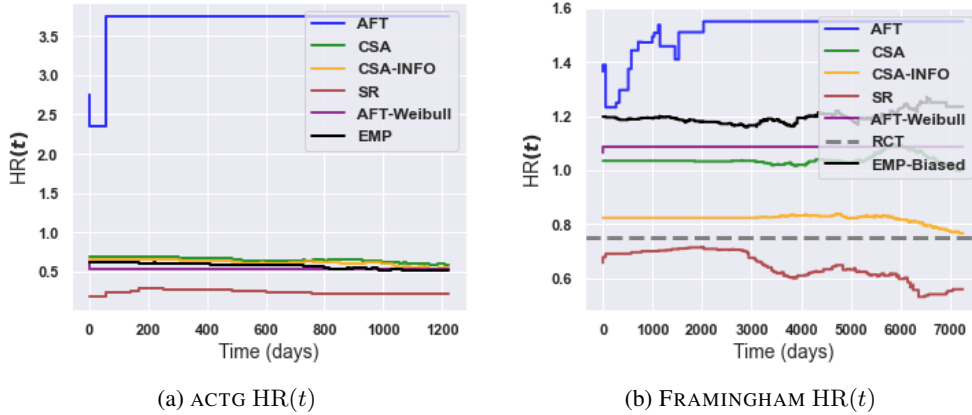

Figure 1: Inferred population  $HR(t)$  comparisons on (a) ACTG and (b) FRAMINGHAM datasets.

Figure 1 demonstrates model comparisons across of population hazard,  $HR(t)$ , on ACTG and FRAMINGHAM datasets. Figure 2, summarizes the positive and negative covariate statistics from the isolated extreme top and bottom quantiles on FRAMINGHAM datasets.

|       | age6       | ascvd_hx6  | bmi6       | bpmeds6    | choi5      | dbp6       | diab6      | female     |
|-------|------------|------------|------------|------------|------------|------------|------------|------------|
| count | 129.000000 | 129.000000 | 129.000000 | 129.000000 | 129.000000 | 129.000000 | 129.000000 | 129.000000 |
| mean  | 55.558140  | 0.069767   | 29.326328  | 0.317829   | 202.147287 | 75.922481  | 0.116279   | 0.465116   |
| std   | 9.412348   | 0.255748   | 4.800124   | 0.467448   | 40.368053  | 7.184632   | 0.321809   | 0.500726   |
| min   | 35.000000  | 0.000000   | 20.777429  | 0.000000   | 118.000000 | 55.000000  | 0.000000   | 0.000000   |
| 25%   | 50.000000  | 0.000000   | 25.995640  | 0.000000   | 176.000000 | 71.000000  | 0.000000   | 0.000000   |
| 50%   | 54.000000  | 0.000000   | 28.835150  | 0.000000   | 196.000000 | 76.000000  | 0.000000   | 0.000000   |
| 75%   | 61.000000  | 0.000000   | 31.847777  | 1.000000   | 225.000000 | 80.000000  | 0.000000   | 1.000000   |
| max   | 84.000000  | 1.000000   | 45.135681  | 1.000000   | 312.000000 | 100.000000 | 1.000000   | 1.000000   |

  

|       | gluc5      | hdl5       | pad_hx6    | sbp6       | smoke6     | stk_hx6    | mi_hx6     | trigly5    |
|-------|------------|------------|------------|------------|------------|------------|------------|------------|
| count | 129.000000 | 129.000000 | 129.000000 | 129.000000 | 129.000000 | 129.000000 | 129.000000 | 129.000000 |
| mean  | 102.201550 | 43.953488  | 0.007752   | 123.782946 | 0.170543   | 0.015504   | 0.038760   | 164.139535 |
| std   | 34.450912  | 11.543979  | 0.088045   | 13.923879  | 0.377575   | 0.124027   | 0.193774   | 78.358625  |
| min   | 75.000000  | 26.000000  | 0.000000   | 99.000000  | 0.000000   | 0.000000   | 0.000000   | 46.000000  |
| 25%   | 90.000000  | 35.000000  | 0.000000   | 114.000000 | 0.000000   | 0.000000   | 0.000000   | 119.000000 |
| 50%   | 95.000000  | 43.000000  | 0.000000   | 122.000000 | 0.000000   | 0.000000   | 0.000000   | 143.000000 |
| 75%   | 103.000000 | 50.000000  | 0.000000   | 131.000000 | 0.000000   | 0.000000   | 0.000000   | 200.000000 |
| max   | 289.000000 | 95.000000  | 1.000000   | 170.000000 | 1.000000   | 1.000000   | 1.000000   | 468.000000 |

  

|       | age6       | ascvd_hx6  | bmi6       | bpmeds6    | choi5      | dbp6       | diab6      | female     |
|-------|------------|------------|------------|------------|------------|------------|------------|------------|
| count | 129.000000 | 129.000000 | 129.000000 | 129.000000 | 129.000000 | 129.000000 | 129.000000 | 129.000000 |
| mean  | 60.666667  | 0.139535   | 26.375823  | 0.286822   | 197.581395 | 71.627907  | 0.046512   | 0.604651   |
| std   | 10.185263  | 0.347855   | 5.325558   | 0.454041   | 28.029197  | 11.657260  | 0.211411   | 0.490832   |
| min   | 37.000000  | 0.000000   | 17.676632  | 0.000000   | 118.000000 | 49.000000  | 0.000000   | 0.000000   |
| 25%   | 53.000000  | 0.000000   | 22.687889  | 0.000000   | 180.000000 | 62.000000  | 0.000000   | 0.000000   |
| 50%   | 60.000000  | 0.000000   | 25.285077  | 0.000000   | 198.000000 | 70.000000  | 0.000000   | 1.000000   |
| 75%   | 69.000000  | 0.000000   | 29.230393  | 1.000000   | 217.000000 | 81.000000  | 0.000000   | 1.000000   |
| max   | 78.000000  | 1.000000   | 45.992112  | 1.000000   | 290.000000 | 105.000000 | 1.000000   | 1.000000   |

  

|       | gluc5      | hdl5       | pad_hx6    | sbp6       | smoke6     | stk_hx6    | mi_hx6     | trigly5     |
|-------|------------|------------|------------|------------|------------|------------|------------|-------------|
| count | 129.000000 | 129.000000 | 129.000000 | 129.000000 | 129.000000 | 129.000000 | 129.000000 | 129.000000  |
| mean  | 96.023256  | 58.550388  | 0.054264   | 128.007752 | 0.217054   | 0.046512   | 0.054264   | 119.937984  |
| std   | 16.391912  | 16.147253  | 0.227420   | 22.184417  | 0.413847   | 0.211411   | 0.227420   | 133.107261  |
| min   | 48.000000  | 22.000000  | 0.000000   | 88.000000  | 0.000000   | 0.000000   | 0.000000   | 33.000000   |
| 25%   | 88.000000  | 49.000000  | 0.000000   | 111.000000 | 0.000000   | 0.000000   | 0.000000   | 63.000000   |
| 50%   | 95.000000  | 59.000000  | 0.000000   | 126.000000 | 0.000000   | 0.000000   | 0.000000   | 87.000000   |
| 75%   | 101.000000 | 69.000000  | 0.000000   | 140.000000 | 0.000000   | 0.000000   | 0.000000   | 109.000000  |
| max   | 228.000000 | 101.000000 | 1.000000   | 214.000000 | 1.000000   | 1.000000   | 1.000000   | 1149.000000 |

(a) FRAMINGHAM  $HR(t|x) < 0.024$ (b) FRAMINGHAM  $HR(t|x) > 1.916$ Figure 2: Covariate statistics for top (a) and bottom (b) quantiles, of the median log  $HR(t|x)$  values for the test set of FRAMINGHAM.

#### 4.4 ARCHITECTURE OF THE NEURAL NETWORK

We detail the architecture of neural-based methods, namely, baselines (AFT-log-Normal, AFT-Weibull, SR) and our proposed methods (CSA and CSA-INFO). All methods are trained using one NVIDIA P100 GPU with 16GB memory. In all experiments we set the minibatch size  $M = 200$ , Adam optimizer with the following hyperparameters: learning rate  $3 \times 10^{-4}$ , first moment 0.9, second moment 0.99, and epsilon  $1 \times 10^{-8}$ . Further, all network weights are initialed according to  $\text{Uniform}(-0.01, 0.01)$ . Datasets are split into training, validation and test sets according to 70%, 15% and 15% partitions, respectively, stratified by event and treatment proportions. The validation set is used for hyperparameter search and early stopping. All hidden units in  $\{h_A(\cdot), \nu_A(\cdot)\}$ , are characterized by Leaky Rectified Linear Unit (ReLU) activation functions, batch normalization and dropout probability of  $p = 0.2$  on all layers. The output layers of predicted times  $\{T_A, C_A\}$  have an additional exponential transformation.

**Encoder** The encoding function  $\Phi(\cdot)$  for mapping  $r = \Phi(x)$  is shared among all the neural based methods (proposed and baselines) and specified in terms of two-layer MLPs of 100 hidden units.

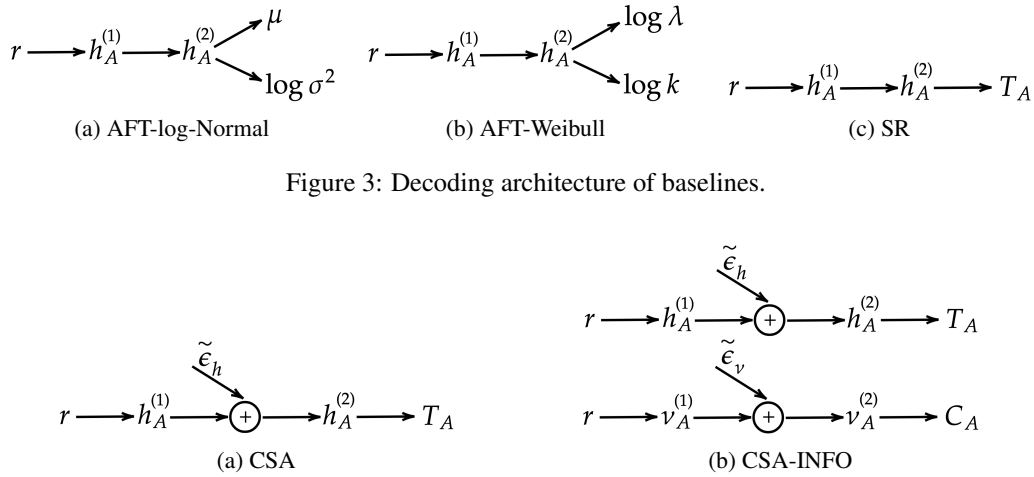

Figure 3: Decoding architecture of baselines.

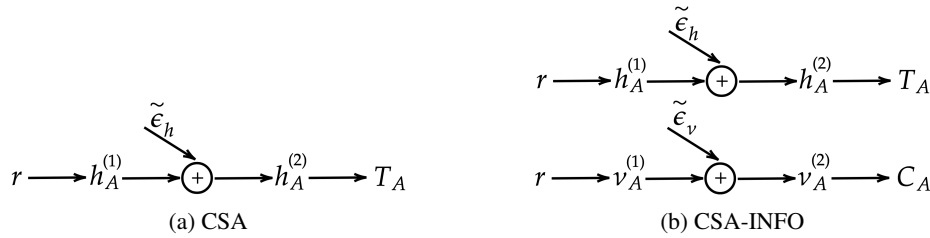

Figure 4: Decoding architecture of proposed methods.

**Decoder** Figure 3 shows the architectural details of the baselines, where the decoding function  $h_A(\cdot)$  is specified in terms of two-layer MLPs of 100 hidden units. Further, the proposed *planar* flow based methods shown in Figure 4, are comprised of two-layer MLPs for  $\{h_A(\cdot), \nu_A(\cdot)\}$  of

dimensions  $[100, 200]$ . Moreover, the hidden layers  $\{h_A^{(2)}, \nu_A^{(2)}\}$ , take as input the concatenated  $[h_A^{(1)}, \tilde{\epsilon}_h]$  and  $[\nu_A^{(1)}, \tilde{\epsilon}_\nu]$  respectively. Finally, we set the planar flow dimensions for both  $\{\tilde{\epsilon}_\nu, \tilde{\epsilon}_h\}$  to 100.

## REFERENCES

- Ralf Bender, Thomas Augustin, and Maria Blettner. Generating survival times to simulate cox proportional hazards models. *Statistics in medicine*, 2005.
- Ashley L Buchanan, Michael G Hudgens, Stephen R Cole, Bryan Lau, Adaora A Adimora, and Women’s Interagency HIV Study. Worth the weight: using inverse probability weighted cox models in aids research. *AIDS research and human retroviruses*, 2014.
- Weihua Cao, Anastasios A Tsiatis, and Marie Davidian. Improving efficiency and robustness of the doubly robust estimator for a population mean with incomplete data. *Biometrika*, 2009.
- P. Chapfuwa, C. Tao, C. Li, I. Khan, K. J. Chandross, M. J. Pencina, L. Carin, and R. Henao. Calibration and uncertainty in neural time-to-event modeling. *IEEE Transactions on Neural Networks and Learning Systems*, 2020.
- Paidamoyo Chapfuwa, Chenyang Tao, Chunyuan Li, Courtney Page, Benjamin Goldstein, Lawrence Carin, and Ricardo Henao. Adversarial time-to-event modeling. In *ICML*, 2018.
- Richard K Crump, V Joseph Hotz, Guido W Imbens, and Oscar A Mitnik. Moving the goalposts: Addressing limited overlap in the estimation of average treatment effects by changing the estimand. Technical report, National Bureau of Economic Research, 2006.
- Scott M Hammer, David A Katzenstein, Michael D Hughes, Holly Gundacker, Robert T Schooley, Richard H Haubrich, W Keith Henry, Michael M Lederman, John P Phair, Manette Niu, et al. A trial comparing nucleoside monotherapy with combination therapy in hiv-infected adults with cd4 cell counts from 200 to 500 per cubic millimeter. *New England Journal of Medicine*, 1996.
- Daniel G Horvitz and Donovan J Thompson. A generalization of sampling without replacement from a finite universe. *Journal of the American statistical Association*, 1952.
- Edward L Kaplan and Paul Meier. Nonparametric estimation from incomplete observations. *Journal of the American statistical association*, 1958.
- David G Kleinbaum and Mitchel Klein. *Survival analysis*. Springer, 2010.
- Fan Li, Kari Lock Morgan, and Alan M Zaslavsky. Balancing covariates via propensity score weighting. *Journal of the American Statistical Association*, 2018.
- Paul R Rosenbaum and Donald B Rubin. The central role of the propensity score in observational studies for causal effects. *Biometrika*, 1983.
- Michael Schemper, Samo Wakounig, and Georg Heinze. The estimation of average hazard ratios by weighted cox regression. *Statistics in medicine*, 2009.
- Bernard W Silverman. *Density estimation for statistics and data analysis*. CRC press, 1986.
- Rodney A Sparapani, Brent R Logan, Robert E McCulloch, and Purushottam W Laud. Nonparametric survival analysis using bayesian additive regression trees (bart). *Statistics in medicine*, 2016.
- Ludovic Trinquart, Justine Jacot, Sarah C Conner, and Raphaël Porcher. Comparison of treatment effects measured by the hazard ratio and by the ratio of restricted mean survival times in oncology randomized controlled trials. *Journal of Clinical Oncology*, 2016.
- Lihui Zhao, Lu Tian, Hajime Uno, Scott D Solomon, Marc A Pfeffer, Jerald S Schindler, and Lee Jen Wei. Utilizing the integrated difference of two survival functions to quantify the treatment contrast for designing, monitoring, and analyzing a comparative clinical study. *Clinical trials*, 2012.
